# Supplementary material for: Can non-pharmacological interventions reduce hospital admissions in people with dementia? A systematic review
Source: PLoS One. 2019 Oct 21;14(10):e0223717. doi: 10.1371/journal.pone.0223717 (PMC6802851; doi:10.1371/journal.pone.0223717)
Supplement: S2 File — (XLSX) [file pone.0223717.s003.xlsx]

## Sheet: Data Extraction
Key
	Unpublished data from authors
NR	Not recorded
								Participants						Intervention			Outcome (hospitalisation)				Sample Size		Number Hospitalised		Number NOT Hospitalised		Number of days in hospital				Mortality
Author	Title	Year	Country Of Origin	Design	Setting	Unit of Randomisation	Inclusion Criteria	Number Randomized	Mean Age	Sex	Co-Morbidity	Dementia Severity/MMSE	Type of Dementia	Intervention Group	Control	Broad Type of intervention	Outcome time points	Type of analysis/adjustment	Primary or Secondary outcome	How outcome was measured	Intervention	Control	Intervention (N)	Control (N)	Intervention (N)	Control (N)	Intervention Mean	Intervention Standard Deviation	Control Mean	Control Standard Deviation	Intervention (died)	Intervention (survived)	Control (died)	Control (survived)
H. W. Amjad, S. K. Roth, D. L. Huang, J. Willink, A. Black, B. S. Johnston, D. Rabins, P. V. Gitlin, L. N. Lyketsos, C. G. Samus, Q. M.	Health Services Utilization in Older Adults with Dementia Receiving Care Coordination: the MIND at Home Trial	2017	USA	RCT	Community Residing	Dementia Patient	70+, English Speaking, community residing in Baltimore, DSM 4 Dementia or cognitive disorder not otherwise specified, >1 unmet care needs on Johns Hopkins dementia needs assessment, had a reliable partner to attend visits	303	84	36% male	no differences at baseline between groups; majority(80%) had CVD; more than half had endocrine disease; only 6% had pulmonary disease	MMSE = 19.1	87.5% Diagnosis of dementia, the rest MCI	18 months of care co-ordination by team (community worker linked to nurse and geriatric psychiatrist). This team identified needs, provided dementia education and skills, coordinating referrals and linkages to other services and care monitoring.	Received the results of Johns Hopkins dementia needs assessment with recommendations for each unmet need and a brief resource guide.	Care Management	18 months	Intention to treat	Secondary	Interviews with carers	110	193	40	58	70	135	3.82	10.9	3.45	11.9	4	106	13	180
B. F. Michalowsky, S. Eichler, T. Hertel, J. Dreier, A. Zwingmann, I. Wucherer, D. Rau, H. Thyrian, J. R. Hoffmann, W	Healthcare utilization and costs in primary care patients with dementia: baseline results of the DelpHi-trial	2017	Germany	Cluster RCT	Community Residing	GP Practice	70+ living at home, score 8 or lower on the DemTect Scale	136 GP's (634 dementia patients)	80	39% male	mean SD of comorbidities(ICD10 diagnoses) in the sample: 13.3 (7.6)	Mild 53%, Moderate 22%, Severe 3%; mean MMST score was approximately 22.8 (SD 4.9)	Only 38% formal diagnosis dementia, however DemTech is more sensitive measure	Care management by 6 trained dementia nurses, using a computer based interventional management system. Identify unmet needs, task list generated and discussed with multidisciplinary team, treatment plan is generated from this discussion. 6 months 1 visits 1 hour every month from the nurses, following 6 months the task completion was monitored.	Care as usual	Care Management	12 Months	Unclear	Secondary	Interviews with carers	252	108	15	14	237	94	4.034	0.864	4.4	1.427	35/408	373/408	19/226	207/226
Kaisu H. Pitka, Minna M. Po¨ysti, Marja-Liisa Laakkonen, Reijo S. Tilvis, Niina Savikko, Hannu Kautiainen, Timo E. Strandberg	Effects of the Finnish Alzheimer Disease Exercise Trial (FINALEX)	2013	Finland	RCT	Community Residing	Patient Carer dyad	>65, on the Alzheimer's disease drug reimbursement register, live in Helsinki, Espoo or Vantaa. Not terminal, living with spousal carer, had at least 1 fall, reduced walking speed or unintentional weight loss	210	78	43% Male	Charlson Co-morbidity Index 2.7	67% moderate or Severe Alzheimer's, MMSE 18	100% Alzheimer's	(GROUP based) used group based exercise, with 4hour visits to day centres twice a week, groups of 10 with 2 specialised physio's. Effect exercise time of 1 hour per session.	Usual community care but were given oral and written advice from the nurses regarding exercise and nutrition.	Physio therapy	24 months	Intention to Treat, unadjusted for severity of dementia or death	Secondary	Used central medical registers and medical records for 2 years after randomization	70 (Group)	70	32	31	38	39	8.31	19.82	15.16	33.34	7	63	8	62
														HOME based) Home visits from a dementia specialist physio therapist using 'goal orientated tailored therapy, 1 hour twice a week.							70 (Home)		31		39		10.07	27.18			2	68
Ulla Eloniemi-Sulkava, Marja Saarenheimo,_x0002_ Marja-Liisa Laakkonen, Minna Pietila, Niina Savikko,Hannu Kautiainen, Reijo S. Tilvis and Kaisu H. Pitkla	Family Care as Collaboration: Effectiveness of a Multicomponent Support Program for Elderly Couples with Dementia. Randomized Controlled Intervention Study	2009	Finland	RCT	Community Residing	Patient Carer dyad	Living in Helsinki, MMSE <23, clinical dementia rating scale >= 1, diagnosis of dementia on the social insurance institution of Finland, living with spouse.	125	78	59% male	Charlson Co-morbidity Index 2.4	73% Moderate or severe MMSE 13.8	87% Alzheimer's 5% Vascular	A family care coordinator (a public health nurse advanced 3.5 year training and specific dementia training) created a support plan, geriatrician provided comprehensive assessments, goal orientated support group meetings (5/year) for spouse caregivers, with individualized services.	Care as usual	Care Co-ordinator	24 months	Intention to Treat, un adjusted for severity of dementia and death	Secondary	Used central medical registers and medical records for 2 years after randomization	63	62	20	17	43	45	1.71	3.59	2.53	6.64	NR	NR	NR	NR
Meeuwsen, E.M., R. van der Aa, G. Goluke-Willemse,	Cost-Effectiveness of One Year Dementia Follow-Up Care by Memory Clinics or General Practitioners: Economic Evaluation of a Randomised Controlled Trial	2013	Netherlands	RCT	Community Residing	Patient Carer dyad	New dementia diagnosis, with a clinical dementia rating score of 0.5, 1 or 2 , with a caregiver, both care giver and patient able to consent.	175	78	47% male	Cumulative Illness Rating scale for Geriatrics = 9	80% Mild, 16% Moderate, MMSE 22.7	61% Alzheimer's, 10% Vascular, 29% mixed/other	Post Diagnosis treatment co-ordinated by a memory clinic. Memory clinic used the Dutch Institute for Healthcare Improvement guidelines.	Post Diagnosis treatment co-ordinated by GP's. GP's used the Dutch general practice and homecare dementia guidelines.	Memory Clinic	12 months	Unclear	Secondary	Taken from a Case Record form filled in by carers	83	77	16	8	67	69	NR	NR	NR	NR	NR	NR	NR	NR
Engedal, K.	Day care for demented patients in general nursing homes. Effects on admissions to institutions and mental capacity	1989	Norway	RCT	Community Residing	Dementia patient	>75 living at home registered with one of eight home-nurse offices	77	80	31% male	NR	MMSE = 18	62% Alzheimer's, 23% Vascular	Day care centre staffed with 2 nurse aids and one occupational therapist, offering social physical and occupational activities.	Care as usual	Day Care	12 months	Intention to Treat, unadjusted for severity of dementia or death	Secondary	NR	38	39	18	16	20	23	NR	NR	NR	NR	4	34	6	33
Kohler, L.M.-F., C. Hein, J. Fendrich, K. Heymann,	Does an interdisciplinary network improve dementia care? Results from the IDemUck-study	2014	Germany	RCT	Community Residing	Dementia patient	>55, lived in the geographical area, no severe depression, a DemTect score <9, spoke German, no severe sensory impairment	235	78	32% male	NR	38% mild dementia, 43% moderate, 9% severe dementia, 6% no dementia MMSE = 18.9	NR	The intervention group was assigned to a full member GP of the Uckermark dementia network. This GP had undergone specialised training in management and diagnosis and was well connected to local specialist.	The control group was assigned to associate member GP's who appear to be the usual care group.	Enhanced GP	12 months	State adjusted for age and gender, not clear in the results table or text if this occurred.	Secondary	NR	97	106	5	4	92	102	NR	NR	NR	NR	8	89	10	96
Duru, O.K.E., S. L. Vassar, S. D. Chodosh, J. Vickrey, B. G.	Cost evaluation of a coordinated care management intervention for dementia	2009	USA	Cluster RCT	Community Residing	GP Practice	>65, enrolled in Medicare, dementia diagnosis and an informal care at least 18.	408	80	45% male	Charlson Co-morbidity Index 2.6	Mean dementia severity score 6 (range 0-17 higher is more severe)	76% Alzheimer's, 7% vascular, 16% other	Intervention arm were assigned a care manager. Care managers performed structure home assessments, identified problems, initiated care plans and sent summary's to home physicians, they provided ongoing care as need and reassessed every 6 months. Additional community services were also made available such as increased respite care.	Care as usual	Case Manager	12 months	States Intention to treat, excluded patients who died. But would mean around 100 dying	Secondary	Taken from "detailed Surveys"	170	126	53	41	117	85	1.2	2.64	1.8	5.04	NR	NR	NR	NR	.
Voigt-Radloff, S.G., M. Leonhart, R. Schornstein, K. Jessen, F. Bohlken, J. Metz, B. Fellgiebel, A. Dodel, R. Eschweiler, G. Vernooij-Dassen, M. Rikkert, M. O. Hull, M.	A multicentre RCT on community occupational therapy in Alzheimer's disease: 10 sessions are not better than one consultation	2011	Germany	RCT	Community Residing	Patient Carer dyad	Mild to moderate dementia MMSE (14-24), diagnosed as Alzheimer's or mixed dementia diagnosed to ICD 10 criteria by a physician with at least 5 years experience. Living in the community with a carer or having a care present at least twice a week. Those who were depressed or needing major physical nursing care were excluded.	141	78	42% male	NR	10% mild or moderate dementia MMSE 20.4	100% Alzheimer's or mixed.	10 occupational therapy sessions of 1 hour duration held over 5 weeks within the home environment. This consisted of a assessment phase shared goal setting and treatment phase to reach the one or two goals set. The carer was involved in learning how to supervise, problem solving and coping strategies.	Control group received 1 hour of occupational therapy, from the same occupational therapists, and received a 10 page leaflet detailing advice about physical activity and signposted to local dementia services.	Occupational Therapy	12 months	Per protocol	Secondary	Patient interview every 5-7 weeks for 52 weeks	54	50	14	10	40	40	NR	NR	NR	NR	0	54	1	49
Callahan, C.M.B., M. A. Unverzagt, F. W. Austrom, M. G. Damush, T. M. Perkins, A. J. Fultz, B. A. Hui, S. L. Counsell, S. R. Hendrie, H. C.	Effectiveness of collaborative care for older adults with Alzheimer disease in primary care: a randomized controlled trial	2006	USA	RCT	Community Residing	Physicians	None explicitly mentioned aside from having Alzheimer's disease, in the trial protocol (REF) it states Alzheimer's disease, over 65, English speaking and owns a telephone.	153	78	57% male	Chronic disease score 8.8	MMSE = 18	NR	The intervention arm received collaborative care management, education on communication skills; caregiver coping skills; legal and financial advice; patient exercise guidelines with a guidebook and videotape; and a caregiver guide provided by the local chapter of the Alzheimer’s Association. Care managers were geriatric nurse practitioners. Initial bimonthly meetings then once a month for a year,…	Everyone received 40-90 minutes counselling and advice from a geriatric nurse practitioner and provided written materials and access to the local Alzheimer's chapter	Care Management	12 months	Intention to treat	Secondary	Care giver filled in survey at 6 12 and 18 months	84	69	19	13	65	56	NR	NR	NR	NR	8	76	7	62
Bellantonio, S.K., A. M. Fortinsky, R. H. Kleppinger, A. Robison, J. Gruman, C. Kulldorff, M. Trella, P. M.	Efficacy of a geriatrics team intervention for residents in dementia-specific assisted living facilities: effect on unanticipated transitions	2008	USA	RCT	Dementia residential care not own home	Dementia patient	Those moving into two dementia specific living facilities.	100	82	37% male	Number of chronic diseases 1.9	MMSE = 14.8	NR	Intervention arm received four systematic, multidisciplinary assessments conducted by a geriatrician or a geriatrics advanced practice nurse, a physical therapist, a dietician and a social worker, during the first 9 months of their residence in assisted living (at 7, 30, 120 and 320 days).	Care as usual	Enhanced assessment	9 months	Adjusted for sex age and study site.	Secondary	Research assistant asking staff at regular intervals.	48	52	6	10	42	42	NR	NR	NR	NR	NR	NR	NR	NR	.
Graff, M.J.A., E. M. Vernooij-Dassen, M. J. Dekker, J. Jonsson, L. Thijssen, M. Hoefnagels, W. H. Rikkert, M. G.	Community occupational therapy for older patients with dementia and their care givers: cost effectiveness study	2008	Netherlands	RCT	Community Residing	Dementia patient	>65, diagnosed mild to moderate dementia, living in the community, primary care giver at least once a week.	135	78	44% male	Cumulative Illness Rating scale for Geriatrics = 10	100% mild to moderate MMSE= 19	NR	Intervention: 10 sessions of occupational therapy at home over 5 weeks given by well trained (>80 hours and experienced >240 hours) occupational therapists specialising in dementia.	Care as usual	Occupational Therapy	3 months	Unclear	Secondary	Care giver diary of events	67	65	6	7	61	58	1.6	6.8	2.1	8.6	NR	NR	NR	NR
Woods, R.B., E. Edwards, R. Elvish, R. Hoare, Z. H	REMCARE: reminiscence groups for people with dementia and their family caregivers - effectiveness and cost-effectiveness pragmatic multicentre randomised trial	2012	UK	RCT	Community Residing	Patient Carer dyad	Mild to moderate dementia, able to engage with group activity, were living in the community and had a caregiver who was in regular contact who would also participate.	488	77.5	50% male	NR	MMSE 19.3	58% Alzheimer's, 13% Vascular, 9% mixed, 10% Other	Intervention; Joint Reminiscence groups (up to 12 dyads) held weekly for 12 weeks with monthly maintenance sessions for a further 7 month. Sessions followed a treatment manual and were led by two trained volunteers, each session lasted 2 hours and rotated weekly topics.	Care as usual	Reminiscence	10 months	Unclear	Primary	Client Services Receipt Inventory, interview with patient and carer	196	140	23	14	173	126	1.19	7.54	4.09	36.24	17	179	17	123
Laakkonen, M.L.H., E. Savikko, N. Tilvis, R. S. St	Effects of the self-management groups for people with dementia and their spousal caregivers - A randomized, controlled trial	2014	Finland	RCT	Community Residing	Patient Carer dyad	Newly diagnosed with dementia with a Finish speaking spousal carer	136	77	42% male	Charleston co-morbidity index 2.4	70% mild or possible dementia, 26% moderate dementia, MMSE 20.8	NR	Intervention; 8 weekly sessions of a bespoke designed self help group based on a psychosocial model. Two people trained for 10 days as group facilitators led the sessions.	Controls, usual care plus a leaflet on nutrition and exercise.	Self Help	24 months	Intention to treat	Primary	Used central medical registers and medical records for 2 years after randomization	67	69	19	18	48	51	2.78	7.88	2.86	7.7	0	67	2	67
Bass, D.M.J., K. S. Maslow, K. Wilson, N. L. Morga	Impact of the care coordination program "partners in Dementia Care" on veterans' hospital admissions and emergency department visits	2015	USA	Cluster RTC	Community Residing	Administrative site, covering a city.	>60 , at least one ICD-9 dementia diagnostic code, live in the community	508	79	98% male	NR	NR	NR	Intervention: Partners in Dementia Care provided coaching for patients and caregivers on how to find solutions to daily problems exacerbated by their Alzheimer's. Contacts were at minimum once per month over telephone or email. Each patient had two co-ordinators one for medical concerns and one for non medical concerns.	Control: usual care. Both received dementia education materials.	Coaching	12 months	Unclear	Primary	Electronic health data for Veterans Affairs hospitals, and care giver interviews for other institutions.	206	122	15	46	191	76	NR	NR	NR	NR	38	168	19	103	.
Sogaard, R.S., J. Waldorff, F. B. Eckermann, A. Bu	Early psychosocial intervention in Alzheimer's disease: cost utility evaluation alongside the Danish Alzheimer's Intervention Study (DAISY)	2014	Denmark	RCT	Community Residing	Patient Carer dyad	>50, diagnosis of dementia within the last year, MMSE>20, with a carer, and non institutional no severe co-morbidities	330	76	46% male	Charlson comorbidity index No comorbidity 42% 1 comorbidity 42% over 2 comorbidities 16%	MMSE 24	Alzheimer's 72% Mixed 25% Lewy Body 3%	Individual and group based counselling sessions, plus educational courses and telephone counselling, (The DAISY intervention) over 12 months	Controls were followed up (3 times), and were interviewed about their current symptoms and daily life and informed about available support programs. Any problems found were referred to health services.	Counselling and support	12 months	Intention to treat	Primary	National Registries and telephone interviews.	163	167	87	95	76	72	15.9	22.8	12.9	18.8	34	129	17	150
Schwarzkopf, L.M., P. Kunz, S. Holle, R. Lauterber	Costs of care for dementia patients in community setting: an analysis for mild and moderate disease stage	2011	Germany	Cluster RCT	Community Residing	GP Practice	At least 65, mild to moderate dementia (MMSE 10 -24) and a member of the AOK insurance plan	383	80.4	31.9% Male	NR	MMSE 18.7	Alzheimer's 37% Vascular 27% Mixed 5% Not precisely listed 31%	(Intervention no Counsellor) GP's received additional training in diagnosis (all groups) and treatments (intervention arms only), in addition the intervention arms had rapid access to outpatient dementia specialists and family caregiver support groups.	GP's received additional training in diagnosis	Enhanced GP plus counselling and support	24 months	Intention to treat	Primary	Health insurance data	(non-counsellor) 108	167	73	118	35	49	20.25	30.71	23.39	29.4	NR	NR	NR	NR
														(intervention with counsellor) arm C also had the addition of a one on one counsellor.							(counsellor) 108		71		37		19.51	23.63
